# Supplementary material for: 17O NMR studies of boronic acids and their derivatives
Source: Royal Society of Chemistry journal article supplement (doi:10.1039/c3nj40903a), 2013-01-01
Supplement: c3nj40903a.pdf [file c3nj40903a.pdf]

# <sup>17</sup>O NMR studies of boronic acids and their derivatives

Błażej Gierczyk, Marcin Kaźmierczak, Grzegorz Schroeder and Andrzej Sporzyński

5

## Supplementary Information

**Table S1** Values of <sup>17</sup>O NMR line halfwidths of substituted phenylboronic acids in [²H]<sub>6</sub>-acetone (0.01 M, 298 K)

| No. | Substituent (X) | $\Delta\nu_{1/2}$ [Hz] of B-O oxygen atom and $\Delta\nu_{1/2}$ of substituent oxygen |                 |                 |
|-----|-----------------|---------------------------------------------------------------------------------------|-----------------|-----------------|
|     |                 | <i>ortho</i> (a)                                                                      | <i>meta</i> (b) | <i>para</i> (c) |
|     |                 |                                                                                       |                 |                 |

|    |                  |         |         |         |
|----|------------------|---------|---------|---------|
| 1  | NMe <sub>2</sub> | 220     | 220     | 220     |
| 2  | NH <sub>2</sub>  | 225     | 220     | 220     |
| 3  | OMe              | 210 275 | 215 300 | 220 350 |
| 4  | Me               | 215     | 215     | 205     |
| 5  | Ph               | 210     | 215     | 195     |
| 6  | H                | 185     | 185     | 185     |
| 7  | F                | 180     | 200     | 200     |
| 8  | Cl               | 180     | 195     | 190     |
| 9  | Br               | 175     | 200     | 195     |
| 10 | I                | 185     | 195     | 190     |
| 11 | CHO              | 190 315 | 200 320 | 195 350 |
| 12 | COOH             | 225 550 | 200 550 | 200 600 |
| 13 | CF <sub>3</sub>  | 190     | 200     | 195     |
| 14 | CN               | 200     | 195     | 195     |
| 15 | NO <sub>2</sub>  | 215 600 | 200 620 | 205 590 |

10

**Table S2** Values of <sup>17</sup>O NMR half line widths of phenylboronic acid esters of monohydroxyl alcohols and phenols in [²H]-chloroform (0.05 M, 298K)

| No. | R                                                               | $\Delta\nu_{1/2}$ [Hz] |
|-----|-----------------------------------------------------------------|------------------------|
| 16  | CH <sub>3</sub>                                                 | 160                    |
| 17  | CH <sub>2</sub> CH <sub>3</sub>                                 | 180                    |
| 18  | CH(CH <sub>3</sub> ) <sub>2</sub>                               | 200                    |
| 19  | C(CH <sub>3</sub> ) <sub>3</sub>                                | 210                    |
| 20  | CH <sub>2</sub> CH <sub>2</sub> CH <sub>3</sub>                 | 185                    |
| 21  | CH <sub>2</sub> CH(CH <sub>3</sub> ) <sub>2</sub>               | 180                    |
| 22  | CH <sub>2</sub> C(CH <sub>3</sub> ) <sub>3</sub>                | 205                    |
| 23  | CH <sub>2</sub> C <sub>6</sub> H <sub>5</sub>                   | 220                    |
| 24  | CH(C <sub>6</sub> H <sub>5</sub> ) <sub>2</sub>                 | 230                    |
| 25  | CH <sub>2</sub> CH <sub>2</sub> C <sub>6</sub> H <sub>5</sub>   | 210                    |
| 26  | CH <sub>2</sub> CH(C <sub>6</sub> H <sub>5</sub> ) <sub>2</sub> | 210                    |
| 27  | CH <sub>2</sub> CH=CH <sub>2</sub>                              | 200                    |
| 28  | CH(CH <sub>3</sub> )CH=CH <sub>2</sub>                          | 210                    |
| 29  | C(CH <sub>3</sub> ) <sub>2</sub> CH=CH <sub>2</sub>             | 215                    |
| 30  | C <sub>6</sub> H <sub>5</sub>                                   | 320                    |

15

**Table S3** Values of  $^{17}\text{O}$  NMR half line widths of phenylboronic acid esters of aliphatic diols in  $[\text{}^2\text{H}]$ -chloroform (0.05 M, 298K)

| No. | Compound                                                    | $\Delta\nu_{1/2}$ [Hz] |     |
|-----|-------------------------------------------------------------|------------------------|-----|
|     |                                                             | O1                     | O2  |
| 31  | $\text{R}_{1-4} = \text{H}$                                 |                        | 85  |
| 32  | $\text{R}_1 = \text{Me}, \text{R}_{2,4} = \text{H}$         | 125                    | 85  |
| 33  | $\text{R}_{1,2} = \text{Me}, \text{R}_{3,4} = \text{H}$     | 140                    | 90  |
| 34  | $\text{R}_{1,3} = \text{Me}, \text{R}_{2,4} = \text{H}$     |                        | 115 |
| 35  | $\text{R}_{1,4} = \text{Me}, \text{R}_{2,3} = \text{H}$     |                        | 115 |
| 36  | $\text{R}_{1,3} = \text{Me}, \text{R}_4 = \text{H}$         | 145                    | 125 |
| 37  | $\text{R}_{1-4} = \text{Me}$                                |                        | 155 |
| 38  | $\text{R}_1 = \text{Ph}, \text{R}_{2,4} = \text{H}$         | 140                    | 95  |
| 39  | $\text{R}_{1,2} = \text{Ph}, \text{R}_{3,4} = \text{H}$     | 160                    | 100 |
| 40  | $\text{R}_{1,3} = \text{Ph}, \text{R}_{2,4} = \text{H}$     |                        | 165 |
| 41  | $\text{R}_{1,4} = \text{Ph}, \text{R}_{2,3} = \text{H}$     |                        | 170 |
| 42  | $\text{R}_{1,3} = \text{Ph}, \text{R}_4 = \text{H}$         | 180                    | 165 |
| 43  | $\text{R}_{1-4} = \text{Ph}$                                |                        | 195 |
| 44  | $\text{R}_{1-6} = \text{H}$                                 |                        | 120 |
| 45  | $\text{R}_1 = \text{Me}, \text{R}_{2,6} = \text{H}$         | 125                    | 120 |
| 46  | $\text{R}_{1,2} = \text{Me}, \text{R}_{3,6} = \text{H}$     | 135                    | 120 |
| 47  | $\text{R}_{1,3} = \text{Me}, \text{R}_{2,4,6} = \text{H}^a$ |                        | 125 |
| 48  | $\text{R}_5 = \text{Me}, \text{R}_{1,4,6} = \text{H}$       |                        | 120 |
| 49  | $\text{R}_{5,6} = \text{Me}, \text{R}_{1,4} = \text{H}$     |                        | 120 |
| 50  | $\text{R}_{1,3} = \text{Me}, \text{R}_{4,6} = \text{H}$     | 135                    | 125 |
| 51  | $\text{R}_{1,2,3,4} = \text{Me}, \text{R}_{5,6} = \text{H}$ |                        | 140 |
| 52  | $\text{R}_{1-6} = \text{Me}$                                |                        | 150 |
| 53  | $\text{R}_1 = \text{Ph}, \text{R}_{2,6} = \text{H}$         | 150                    | 120 |
| 54  | $\text{R}_{1,3} = \text{Ph}, \text{R}_{2,4,6} = \text{H}^a$ |                        | 155 |
| 55  | $n = 2$                                                     |                        | 130 |
| 56  | $n = 3$                                                     |                        | 135 |
| 57  | $n = 4$                                                     |                        | 140 |
| 58  | $n = 6$                                                     |                        | 150 |
| 59  | $n = 8$                                                     |                        | 165 |
| 60  | $n = 1$                                                     |                        | 100 |
| 61  | $n = 2$                                                     |                        | 110 |
| 62  | $n = 3$                                                     |                        | 115 |
| 63  | $n = 5$                                                     |                        | 115 |
| 64  | $n = 7$                                                     |                        | 120 |

<sup>a</sup> Mixture of diastereoisomers.

**Table S4** Values of  $^{17}\text{O}$  NMR half line widths of phenylboronic acid esters of aromatic diols in  $[\text{}^2\text{H}]\text{-chloroform}$  (0.05 M, 298K)

| No. | Compound                                                                            | $\Delta\nu_{1/2}$ [Hz] |     |     |
|-----|-------------------------------------------------------------------------------------|------------------------|-----|-----|
|     |                                                                                     | O1                     | O2  |     |
| 65  | 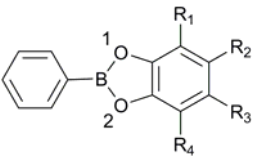   |                        | 180 |     |
| 66  | $R_{1,4} = \text{H}$                                                                |                        | 180 |     |
| 67  | $R_1 = \text{Me}, R_{2,4} = \text{H}$                                               | 190                    | 180 |     |
| 68  | $R_2 = \text{Me}, R_{1,3,4} = \text{H}$                                             | 180                    | 180 |     |
| 69  | $R_{1,4} = \text{Me}, R_{2,3} = \text{H}$                                           |                        | 190 |     |
| 70  | $R_{2,3} = \text{Me}, R_{1,4} = \text{H}$                                           |                        | 185 |     |
| 71  | $R_{1,4} = \text{Me}$                                                               |                        | 195 |     |
| 71  |    |                        | 185 |     |
| 72  |    | 205                    | 185 |     |
| 73  |    |                        | 210 |     |
| 74  |    |                        | 210 |     |
| 75  |  |                        | 220 |     |
| 76  |  | $R_{1,2} = \text{H}$   | 185 | 110 |
| 77  | $R_1 = \text{Me}; R_2 = \text{H}$                                                   | 185                    | 125 |     |
| 78  | $R_{1,2} = \text{Me}$                                                               | 185                    | 135 |     |
| 79  |  |                        | 155 |     |

**Table S5** Values of  $^{17}\text{O}$  NMR half line widths of adducts of phenylboronic acid with hydroxy acids in  $[\text{}^2\text{H}]$ -chloroform (0.05 M, 298K)

| No. | Compound                                                                                                                                  | $\Delta\nu_{1/2}$ [Hz] |     |     |
|-----|-------------------------------------------------------------------------------------------------------------------------------------------|------------------------|-----|-----|
|     |                                                                                                                                           | O1                     | O2  | O3  |
| 86  | 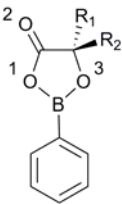 $\text{R}_{1,2} = \text{H}$                             | 100                    | 120 | 180 |
| 87  |  $\text{R}_1 = \text{Me}, \text{R}_2 = \text{H}$         | 105                    | 120 | 190 |
| 88  |  $\text{R}_{1,2} = \text{Me}$                            | 110                    | 120 | 195 |
| 89  | $\text{R}_{1-4} = \text{H}$                                                                                                               | 120                    | 125 | 190 |
| 90  | $\text{R}_1 = \text{Me}, \text{R}_{2,6} = \text{H}$                                                                                       | 120                    | 125 | 195 |
| 91  |  $\text{R}_{1,2} = \text{Me}, \text{R}_{3,4} = \text{H}$ | 120                    | 125 | 205 |
| 92  |  $\text{R}_3 = \text{Me}, \text{R}_{1,2,4} = \text{H}$   | 125                    | 135 | 190 |
| 93  |  $\text{R}_{3,4} = \text{Me}, \text{R}_{1,2} = \text{H}$ | 130                    | 135 | 195 |
| 94  | $\text{R}_{1-4} = \text{Me}$                                                                                                              | 135                    | 140 | 210 |
| 95  |                                                        | 155                    | 125 | 190 |

**Table S6** Values of  $^{17}\text{O}$  NMR half line widths of representative arylboronic acid derivatives belonging to other classes in  $[\text{}^2\text{H}]$ -chloroform (0.05 M, 298K)

| No.              | Compound | $\Delta\nu_{1/2}$ [Hz]                                  |                |                |                |                |
|------------------|----------|---------------------------------------------------------|----------------|----------------|----------------|----------------|
|                  |          | O <sup>1</sup>                                          | O <sup>2</sup> | O <sup>R</sup> |                |                |
| 96               |          | R <sub>1,3</sub> = H                                    | 220            | -              |                |                |
| 97               |          | R <sub>1</sub> = Me, R <sub>2,3</sub> = H               | 250            | -              |                |                |
| 98               |          | R <sub>1</sub> = OMe, R <sub>2,3</sub> = H              | 300            | 365            |                |                |
| 99               |          | R <sub>1</sub> = NO <sub>2</sub> , R <sub>2,3</sub> = H | 300            | 620            |                |                |
| 100              |          | R <sub>2</sub> = Me, R <sub>1,3</sub> = H               | 230            | -              |                |                |
| 101              |          | R <sub>2</sub> = OMe, R <sub>1,3</sub> = H              | 230            | 310            |                |                |
| 102              |          | R <sub>2</sub> = NO <sub>2</sub> , R <sub>1,3</sub> = H | 300            | 580            |                |                |
| 103              |          | R <sub>3</sub> = Me, R <sub>1,2</sub> = H               | 220            | -              |                |                |
| 104              |          | R <sub>3</sub> = OMe, R <sub>1,2</sub> = H              | 220            | 325            |                |                |
| 105              |          | R <sub>3</sub> = NO <sub>2</sub> , R <sub>1,2</sub> = H | 280            | 570            |                |                |
|                  |          | O <sup>1</sup>                                          | O <sup>2</sup> | O <sup>R</sup> |                |                |
| 106              |          | R = H                                                   | 170            | 190            | -              |                |
| 107              |          | R = OMe                                                 | 165            | 190            | 330            |                |
| 108              |          | R = NO <sub>2</sub>                                     | 165            | 195            | 590            |                |
| 109              |          |                                                         | 210            | 250            | -              |                |
|                  |          | O <sup>1</sup>                                          | O <sup>2</sup> | O <sup>3</sup> | O <sup>4</sup> | O <sup>5</sup> |
| 110 <sup>a</sup> |          | 155                                                     | 300            | 180            | 195            | 100            |

<sup>a</sup> In  $[\text{}^2\text{H}]_3$ -acetone at 298 K (c = 0.1 M).

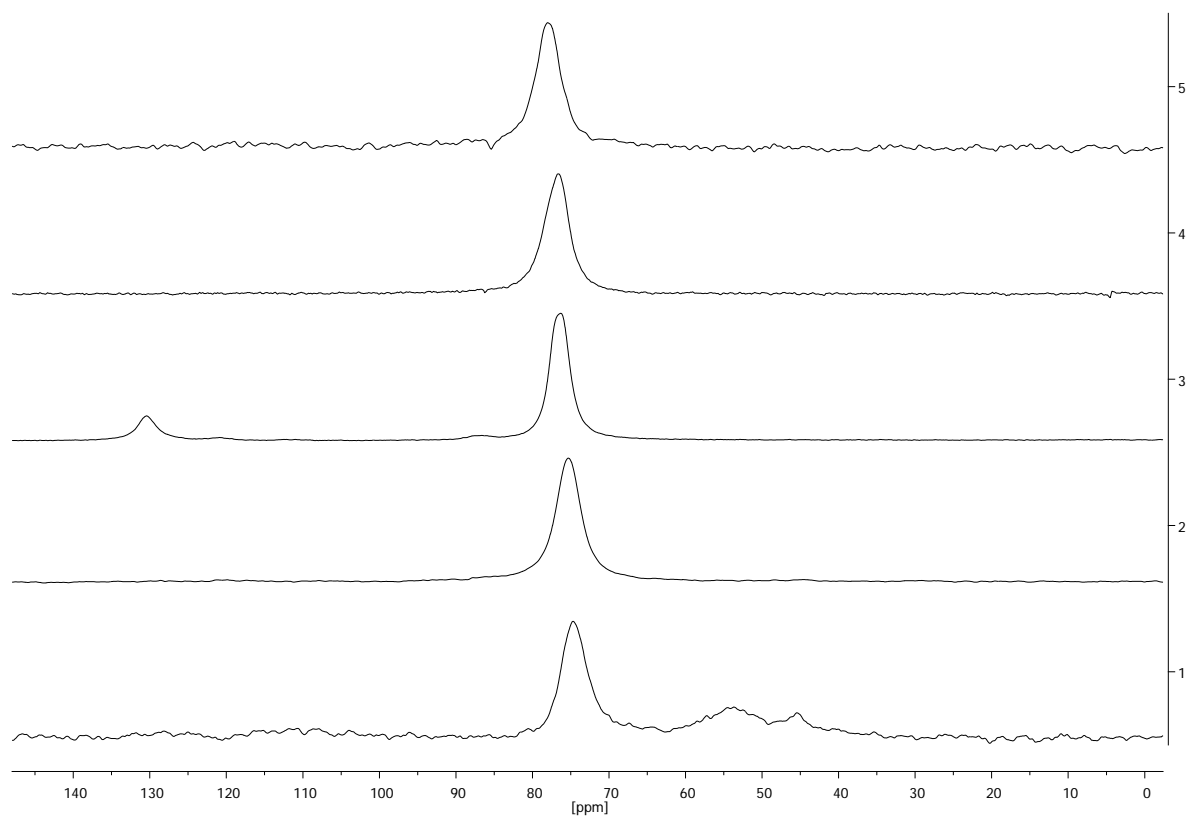

Fig. S1. Selected  $^{17}\text{O}$  NMR spectra of *para* substituted phenylboronic acids (from the bottom): 4-methoxyphenylboronic acid, phenylboronic acid (signal at *ca.* 130 ppm is assigned to boroxine), 4-bromophenylboronic acid, 4-methylphenylboronic acid and 4-cyanophenylboronic acid (all spectra measured in acetone- $d_6$  at 298 K for unlabeled compounds).

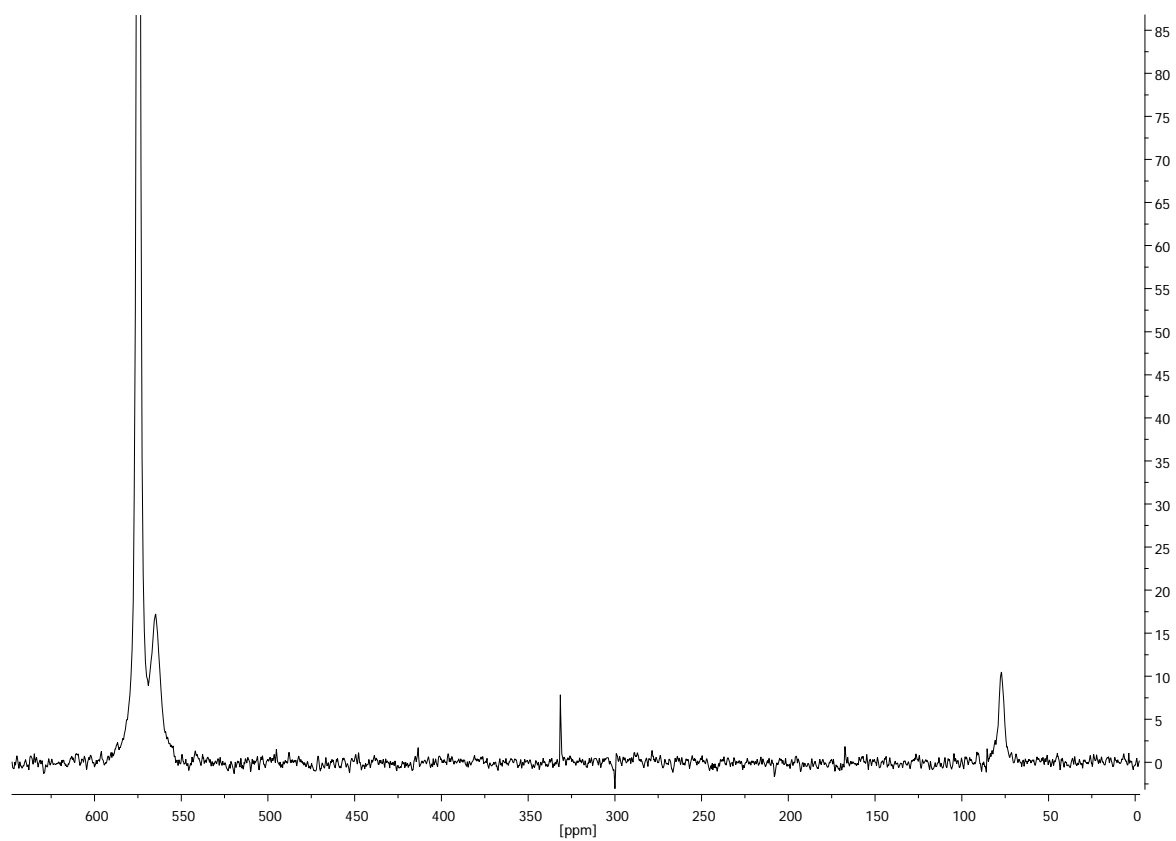

Fig. S2. The  $^{17}\text{O}$  NMR spectrum of 3-formylphenylboronic acid (in acetone- $d_6$ , at 298 K, unlabeled compound; the signal at 575 ppm is assigned to the solvent)

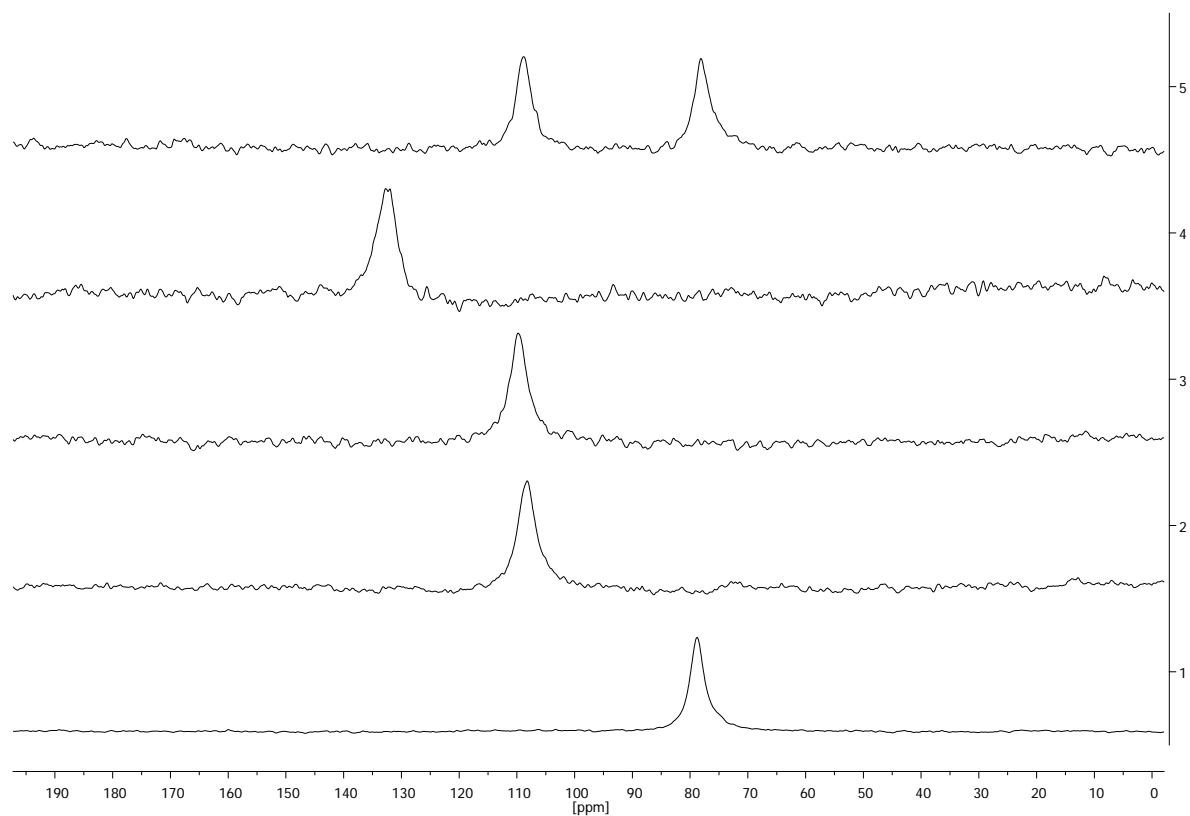

Fig. S3. Selected  $^{17}\text{O}$  NMR spectra of phenylboronic acid esters with 1,2-aliphatic diols (from the bottom): 1,2-ethanediol, 2R,3R-butanediol, *meso*-2,3-butanediol, 2,3-dimethyl-2,3-butanediol, 1,2-propanediol (all spectra measured in chloroform-*d* at 298 K for unlabeled compounds)



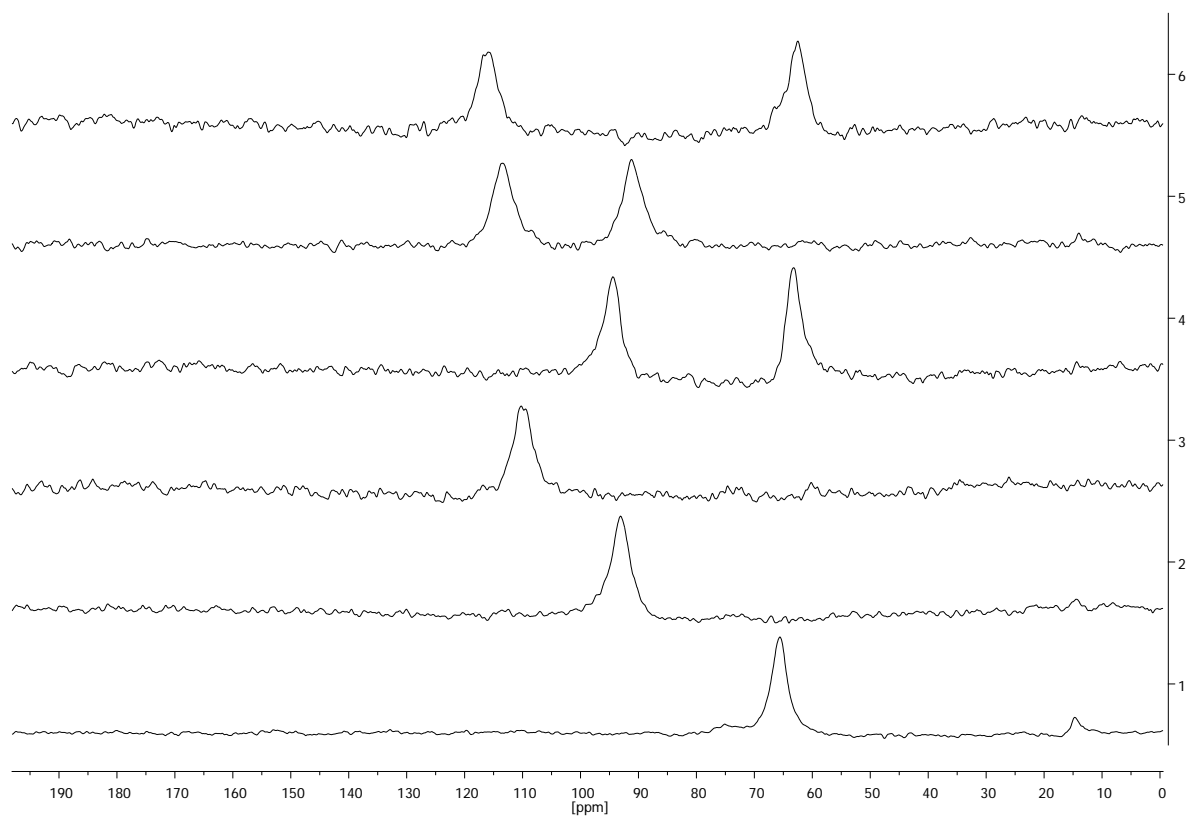

Fig. S4. Selected  $^{17}\text{O}$  NMR spectra of phenylboronic acid esters with 1,3-aliphatic diols (from the bottom): 1,3-propanediol, 2,4-pentanediol, 2,4-dimethyl-2,4-pentanediol, 1,3-butanediol, 2-methyl-2,4-pentanediol, 2-methyl-2,4-butanediol (all spectra measured in chloroform-*d* at 298 K for unlabeled compounds)

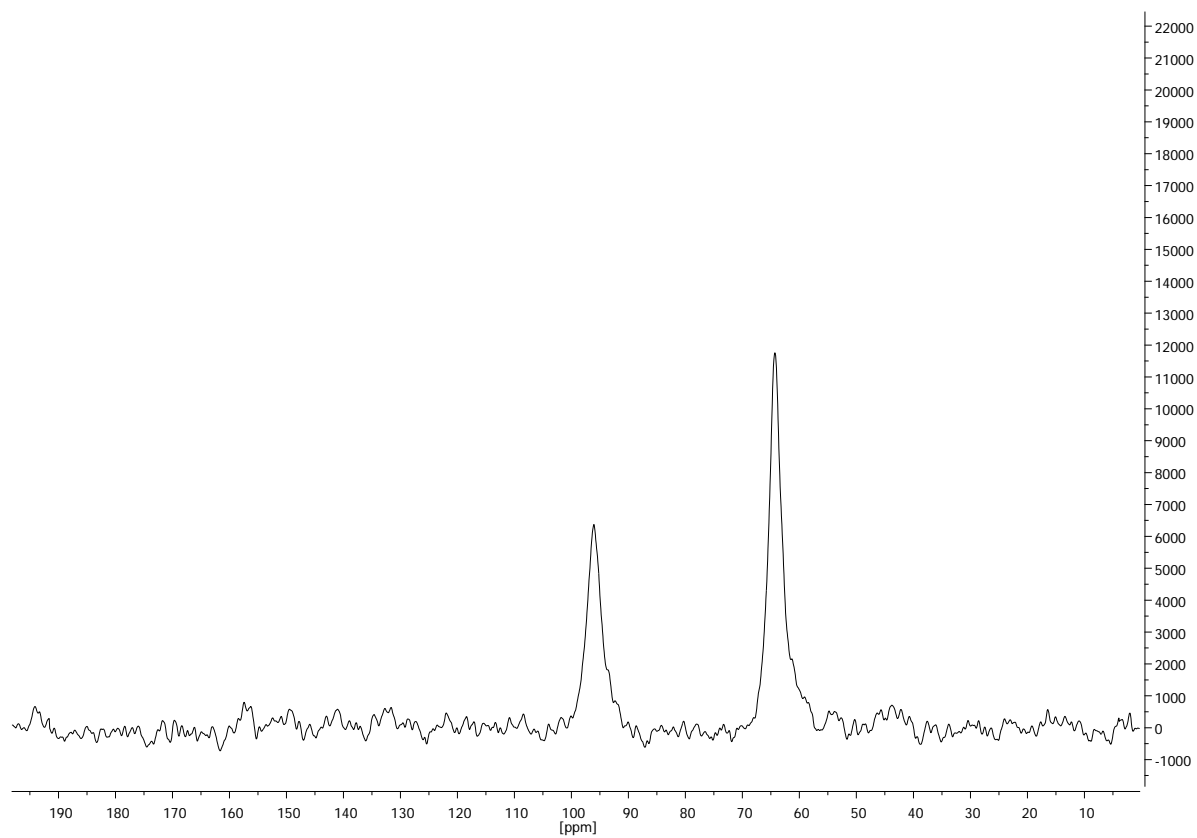

Fig. S5. The  $^{17}\text{O}$  NMR spectrum of compound **106** (in chloroform-*d*, at 298 K, unlabeled compound)
